# Supplementary material
Source: Springer Nature journal article supplement (https://www.springermedizin.de/resource/supplementary/13017_2014_353_MOESM1_ESM.pdf/9636008)

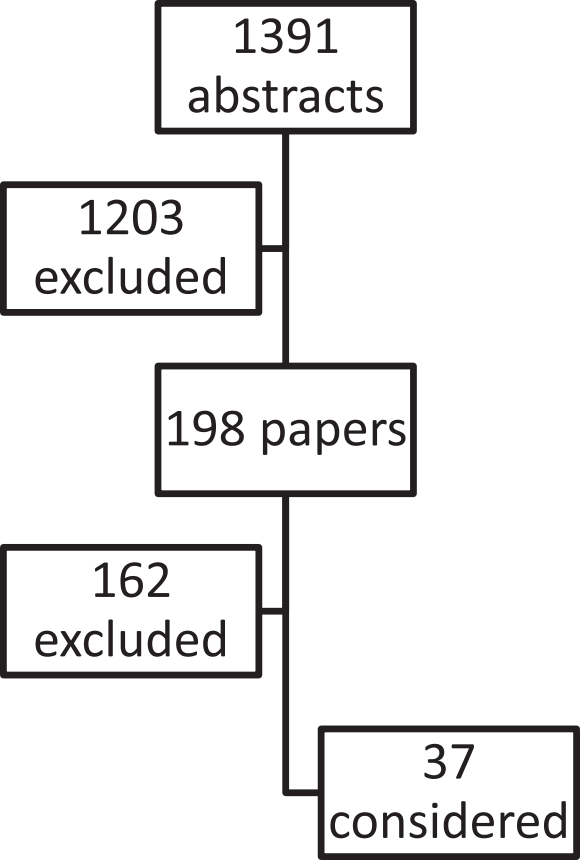

1391  
abstracts

1203  
excluded

198 papers

162  
excluded

37  
considered

Supplement: MOESM1 [file 9636008]
